1           **Male-male interactions select for conspicuous male colouration in damselflies**

2

3   Md Kawsar Khan, Marie E. Herberstein

4   Department of Biological Sciences, Macquarie University, Sydney, Australia

5

6

7   Corresponding author:

8   Md Kawsar Khan

9   Department of Biological Sciences

10   Macquarie University, Sydney

11   NSW-2109, Australia

12   Email: [Kawsar.khan@mq.edu.au](mailto:Kawsar.khan@mq.edu.au)

13   [Phone: +612-9850-6279](tel:+612-9850-6279)

14

15 Abstract

16

17 Male ornamentation, such as conspicuous male colouration, can evolve through female mate  
18 choice. Alternatively, in species without overt female mate preference, conspicuous male  
19 colouration can evolve via intrasexual selection to resolve male-male competition or to prevent  
20 costly male-male mating attempts. Here, we investigated the drivers of conspicuous male  
21 colouration in an ontogenetic colour changing damselfly, *Xanthagrion erythroneurum*, where the  
22 juvenile males are yellow and change colour to red upon sexual maturity. We first showed that  
23 red males were chromatically and achromatically more conspicuous than the yellow males. We  
24 then quantified the condition of the males and showed that red males were larger and in better  
25 condition than yellow males. We tested female preference in a choice experiment where we  
26 artificially manipulated male colour, and found that females did not choose mates based on male  
27 colouration. We further tested whether the male colouration affected male-male interactions. We  
28 presented red and yellow males in the breeding arena, and found that red males received less  
29 intra- and interspecific aggression than yellow males. Our study experimentally showed, for the  
30 first time, that male conspicuousness is not a target of female mate choice in damselflies. Intra-  
31 and interspecific male-male interactions therefore appear to be the driver of conspicuous male  
32 colouration in damselflies.

33 Key words: Ontogenetic colour change, Sexual selection, Sensory ecology, Communication and  
34 signalling, Colour polymorphism, Sexual conflict, Scramble competition

35

36 Introduction

37 Male armaments and ornaments, such as horns in antelopes, the long tails of peacocks, giant hind  
38 legs in beetles, and conspicuous colours in birds, lizards and insects, are not thought to afford  
39 survival benefits, but rather evolve through sexual selection (Balmford et al., 1992a; Balmford et  
40 al., 1992b; Emlen, 2008; Parker, 2013; Petrie et al., 1991). Among ornamental traits, the function  
41 and evolution of male ornamental colouration has been studied in many taxa since Darwin  
42 proposed his sexual selection theory (Jones and Ratterman, 2009). Male conspicuous colouration  
43 can evolve via intersexual selection through female preference (Gomez et al., 2009; Kemp,  
44 2007), or via intra-sexual selection through male-male competition for mating and/or to avoid  
45 male-male mating attempts (Bajer, Molnár, Török, & Herczeg, 2011; Sherratt, 2001).

46 Females are predicted to express mate choice if males vary in their ability to provide either direct  
47 benefits such as parental care, nuptial gifts, higher social status, safer territory, or indirect  
48 benefits such as higher immunity and better genetic alleles (Albo and Peretti, 2015; Georgiev et  
49 al., 2015; Kirkpatrick and Barton, 1997; López Pilar and Martín José, 2005). In this context,  
50 conspicuous colouration may function as a signal of male condition (Hill, 1991; Keyser and Hill,  
51 2000) and by selecting to mate with a conspicuous males over dull males females may be  
52 responding to signals of good condition (Montoya and Torres, 2015; Setchell, 2005; Vásquez  
53 and Pfennig, 2007). Consequently, conspicuous male colour can evolve via female mate choice.

54 Conspicuous male colouration can evolve via male-male competition, in addition to or without  
55 female preference, when males compete for limited breeding resources such as nest sites,  
56 oviposition sites, or to access females for mating (Ahnesjö et al., 2001; Klug et al., 2010; Morris  
57 et al., 1992; Wacker and Amundsen, 2014). Competition for breeding resources can largely

58 determine the mating success in some species, therefore sexual selection can favour male traits to  
59 acquire breeding resources (Debusse et al., 2003; Shuster and Wade, 2003). Otherwise, male-male  
60 competition to access females arises when the males outnumber females, or when the frequency  
61 of receptive females in the breeding territory is lower than that of males (Klug et al., 2010; Weir  
62 et al., 2011). Because of a male biased sex ratio, the males compete with each other to access  
63 females, and only the best quality males are assumed to secure mates (Forslund, 2000; Morris et  
64 al., 1992). Conspicuous colouration can function as an honest signal of male condition, resource  
65 holding potentiality and fighting ability (Ligon and McGraw, 2013; Lim and Li, 2013; Weaver et  
66 al., 2017). Conspicuous males may therefore maintain larger and safer breeding territories,  
67 higher social dominance, and better access to females, which result in higher mating success  
68 (Korzan and Fernald, 2007; Setchell and Wickings, 2005).

69 Conspicuous male colouration is common in many damselflies (Corbet 1999; Bybee et al. 2016).  
70 In territorial damselflies, conspicuousness is condition-dependent and related to males  
71 maintaining territory and achieving higher mating success via female mate choice and inter- and  
72 intraspecific male-male competition (Siva-Jothy, 1999; Svensson et al., 2004; Tynkkynen et al.,  
73 2005). The function of conspicuous male colouration is, however, largely debated in damselflies  
74 where the males do not defend territory. In these damselflies, adult male and female damselflies  
75 assemble in waterbodies such as ponds, lake, streams for mating, and ovipositing. Because of the  
76 high male density and limited oviposition sites, males compete to access and persist in the  
77 mating territories. In such scramble scenarios, males approach females from behind for mating  
78 and females cannot see the colour of males, in the first step of the mating sequence, which is  
79 unlikely to be the point of mate selection (Corbet 1999; Sherratt and Forbes 2001). Subsequently,

80 however, males require the cooperation of females to lock genitalia (Fincke, 1997) and it has  
81 therefore been argued that conspicuous male colour can evolve through female mate choice.

82 Male-male competition for mating is the other probable function of conspicuous male  
83 colouration in damselflies with scramble mating system. In these damselflies, a large number of  
84 conspecific and heterospecific males gather within a breeding arena (pond) for mating, resulting  
85 in male biased aggregations (Corbet, 1999). Conspecific male-male competition arises when two  
86 or more males compete over access to the same female or breeding spot. On the other hand,  
87 interspecific male-male competition occurs in sympatric populations to acquire limited  
88 oviposition and mating sites. These intra- and interspecies competition could induce male-male  
89 interactions which can reduce male fitness (Gering, 2017). In such circumstances, conspicuous  
90 male colouration can evolve to signal male condition thereby reducing intra- and interspecific  
91 male-male interactions. This hypothesis, although intriguing, is yet to be experimentally tested.

92 Here we tested the causative agents of the conspicuous male colouration in *Xanthagrion*  
93 *erythroneurum* damselflies. *Xanthagrion erythroneurum* exhibits ontogenetic colour change,  
94 where the males change colour from yellow to red, about a week after their emergence (Khan  
95 and Herberstein, 2020). First, we tested if red males are more conspicuous than yellow males for  
96 damselfly vision. We then assessed whether the conspicuous colour if conspicuous colouration  
97 signals male condition in this species. Finally, we experimentally tested whether female mate  
98 choice or male-male interactions select for the conspicuous red colouration in males. We  
99 predicted the females would prefer red males over yellow males if the conspicuous red  
100 colouration evolves through female mate choice. On the other hand, male-male interactions  
101 select for conspicuous male colouration we predicted that red males would receive less

102 aggression less conspecific and heterospecific aggression than yellow males in the breeding  
103 arena.

104

105 Methods and Materials

106 Study Species

107 *Xanthagrion erythoneurum* is a medium-sized damselfly (21-23mm) belonging to the  
108 Coenagrionidae family (Zygoptera: Odonata). This species is widely distributed throughout  
109 Australia and commonly found in stagnant freshwater reservoirs such as ponds, marshes, lakes  
110 and dams. The adult males can be distinguished from other sympatric damselflies by their red  
111 face, red thorax, the red colouration of the first and second abdominal segments and the blue  
112 bands on the eighth and ninth abdominal segments (Khan and Herberstein, 2019; Theischinger  
113 and Hawking, 2016). In the Sydney region, this species starts emerging in September and is seen  
114 in flight until June (Khan and Herberstein, 2020). During this whole period, this species remains  
115 reproductively active (Khan and Herberstein, 2020).

116

117 Field site

118 We collected the damselflies from and carried out experiments at a pond located on the North  
119 Ryde campus of Macquarie University, Sydney, Australia (33.772 S, 151.114 E). In this pond,  
120 *Xanthagrion erythoneurum* cooccurs with other damselflies including *Ischnura heterosticta*,  
121 *Austroagrion watsoni*, *Austrolestes annulosus*, *Diplacodes melanopsis* and *Orthetrum*  
122 *caledonicum*. The sympatric species *Ischnura heterosticta* and *Austroagrion watsoni*, like

123 *Xanthagrion erythroneurum*, do not defend a territory but searches for females in the ponds  
124 which looks more like a scramble competition for mating. All three species share shoreline  
125 vegetations at ponds for perching and mating and submerged vegetations for ovipositing.

126

127 Reflective spectrometry

128 We measured the reflective spectra of the collected males and leaves of the vegetation  
129 surrounding the pond to quantify the visual background using a JAZ EL-200 portable  
130 spectrophotometer (Ocean Optics, USA) with a PX-2 pulsed light source. We measured all  
131 spectra in a dark room by setting the spectrophotometer to a constant boxcar width and  
132 integration time settings of 10 and 20 milliseconds respectively, and to average five scans. We  
133 measured the reflectance relative to a white standard (Ocean Optics, USA) to standardize the  
134 measurements. We first immobilized the damselflies by placing them in a refrigerator at 4<sup>0</sup>C for  
135 five minutes. Then, we set the probe of the spectrophotometer perpendicular to the cuticular  
136 surface of the metathorax from a fixed working distance of two millimetres. We took three  
137 reflectance spectra of each male and each background leaf from 300 nm to 700 nm and  
138 subsequently averaged those three measurements. We processed the reflectance spectra with  
139 OceanOptics Spectrasuite software (ver. 1.6.0\_11) and eventually binned to one nm wavelength  
140 intervals before minor LOESS smoothing ( $\alpha = 0.35$ ). We performed the spectral processing using  
141 the package 'pavo' v 2.1 (Maia et al., 2019) in R v 3.5.2 (R core team 2018).

142

143 Visual modelling

144 We calculated the chromatic and achromatic contrast of the red and yellow males against their  
145 background using the receptor noise model (Vorobyev and Osorio, 1998; Vorobyev et al., 2001).  
146 This model calculates the detectability between two colours in just noticeable difference (JND)  
147 units where one JND means that the receiver can distinguish between the colours (Vorobyev et  
148 al., 2001). The receptor noise model has previously been applied in behavioural studies to predict  
149 colour discriminability in various taxa including odonates (Barry et al., 2015; Huang et al., 2014;  
150 Khan and Herberstein, 2019).

151 We aimed to determine how the colour and luminescence of the red and yellow males are  
152 perceived by the receiver i.e. conspecific and heterospecific damselflies. The visual system of *X.*  
153 *erythroneurm* is not known. We however, know that damselflies of the Coenagrionidae family  
154 can have either trichromatic or tetrachromatic visual system (Henze et al., 2013; Huang et al.,  
155 2014). We therefore applied both systems to calculate the chromatic and achromatic contrast of  
156 the red and yellow males against their backgrounds (Khan and Herberstein, 2019). For  
157 trichromatic visual modelling, we applied the photoreceptor sensitivities of *Ischnura*  
158 *heterosticta*, while the photoreceptor sensitivities of *Ischnura elegans* were used for  
159 tetrachromatic modelling (Henze et al., 2013; Huang et al., 2014). We used the photoreceptor  
160 sensitivities of these two species as they are the closest related species in the phylogenetic tree of  
161 our study system whose visual system is known.

162 We calculated the quantum catches of the photoreceptors by following the methods of Vorobyev  
163 and Osorio (1998) (Supplementary method S1). We used standard daylight (D65) as the ambient  
164 light spectrum. We then log-transformed the quantum catches according to the Weber-Fencher



165 law (Vorobyev et al., 2001). Finally, we calculated the chromatic and achromatic contrast of red  
166 and yellow males against their background as a function of the log-transformed quantum catches  
167 weighted by the noise of each photoreceptor (Vorobyev and Osorio, 1998). We performed the  
168 visual modelling in R v 3.5.2 (R core team, 2018) using the package pavo v 2.1 (Maia et al.,  
169 2019).

170

#### 171 Male condition

172 We calculated body length, body mass, lipid and protein content to determine the condition of  
173 the males (Castaños et al., 2017). We captured *X. erythroneurum* males from the field using an  
174 insect sweep net (Khan, 2015; Khan, 2018) and brought them back to the Behavioural Ecology  
175 Laboratory at Macquarie University for morphometric measurements. We took measurements of  
176 the damselflies within two hours after collecting them. We weighed the body mass of the live  
177 damselflies on a balance (Mettler toledo, accuracy 0. 01 mg). Next, we immobilized the  
178 damselflies by cooling them in a refrigerator at 4<sup>0</sup>C for five minutes. We then positioned the  
179 damselflies laterally and took digital photographs using a Canon 600D camera mounted with  
180 Canon EF 55-250 lens. We measured the total body length of the damselflies from the digital  
181 photographs using the ImageJ software (Schneider et al., 2012).

182

#### 183 Lipid Quantification

184 We measured the lipid content of the damselflies by the gravimetric method (Barry and Wilder,  
185 2013). First, we euthanised the damselflies by placing them in a -30<sup>0</sup>C freezer for 10 minutes,  
186 then we dried the damselflies at 60<sup>0</sup>C for 48 hours and then weighed their dried body mass. We

187 then submerged the dried damselflies in chloroform. After 24 hours, we discarded the  
188 chloroform, and replaced it with fresh chloroform for another 24 hours. The chloroform was then  
189 discarded and the damselflies were air-dried under a fume hood at room temperature for another  
190 24 hours. We further dried the damselflies for another 24 hours at 60<sup>0</sup>C and later reweighed the  
191 dried damselflies. The lipid content of each damselfly was calculated as the difference between  
192 the body mass of the damselfly before and after chloroform extraction.

193

#### 194 Protein extraction and quantification

195 We extracted the soluble protein from the damselflies using 0.1 M NaOH (Sigma-Aldrich) as a  
196 lysis buffer. First, we finely ground the dried damselflies with a polypropylene pestle and added  
197 0.1 N NaOH (100µl per 1mg of insect weight). We then vortexed the lysate, sonicated it for 30  
198 minutes in a water bath, and then heated at 90<sup>0</sup>C for 15 minutes. Finally, we centrifuged the  
199 lysate at 13000 rpm for 10 minutes, discarded the undigested tissues that precipitated, and  
200 collected the clarified lysate from the supernatant.

201 We quantified the protein content in the clarified lysates of the damselflies using Pierce<sup>TM</sup> BCA  
202 protein assay kit (Thermo Fisher Scientific). We used the Bovine Serum Albumin (BSA)  
203 supplied with the protein assay kit for preparing the standard solution. We used a linear range of  
204 standard BSA protein concentrations from 1.35 mg to 0.05 mg for making the standard  
205 absorbance curve. We used 0.1 M NaOH (Sigma-Aldrich) as a diluent for the standard solution  
206 preparation, for the damselfly lysates preparation and also for the blank control. We took 25 µL  
207 of standard BSA for standard solution preparation and 25 µL damselfly lysates for sample  
208 protein quantification and then added 0.1 M NaOH (Sigma-Aldrich) to make the final volume

209 200  $\mu$ L. We added the standard and sample solution in triplicates in a in 96 well flat-bottomed  
210 plate and incubated at 37 °C for 30 min. We took the absorbance of the incubated plates at 562  
211 nm using a FLUOstar OPTIMA microplate reader (BMG Labtech). We quantified the relative  
212 protein quantity of the lysates using the standard absorbance curve.

213

#### 214 Female mate choice experiment

215 We experimentally tested if females prefer mating with red or yellow males. The yellow males  
216 are sexually immature and unable to mate (Khan and Herberstein, 2019). We, therefore, painted  
217 red males with yellow colour to determine the effect of male yellow colour on female mate  
218 choice. We performed the female mate choice trials by restraining a female in an insect mating  
219 cage (58cm  $\times$  32cm  $\times$  34cm) with a natural red male and a red male that was painted yellow. We  
220 manipulated the thorax of the damselflies by painting yellow over red using non-toxic Tim &  
221 Tess<sup>TM</sup> poster paint (Khan and Herberstein, 2019). We also painted red over the natural red to  
222 control for the effect of paintings. We took spectra of the painted damselflies to approximate  
223 their natural colour (supplementary figure S1).

224 We placed the mating cage approximately three meters away from the pond — the natural  
225 habitat of the damselflies. We recorded the sexual interactions of the damselflies while sitting  
226 one meter away from the cages. We counted the number of tandems formed by the control red  
227 males and the manipulated yellow males. The tandem is the first step of damselfly mating where  
228 a male becomes physically connected to a female by his cerci. A tandem event can dissociate if  
229 the female does not cooperate, or it can form a wheel if the female cooperates. When a tandem  
230 was formed, we continued the trials until the tandem disassociated or formed a wheel. We

231 recorded the duration of tandems when disassociated and when forming a wheel. When a wheel  
232 was formed, we recorded the duration of the wheel before disassociation.

233 We performed the female mate choice trials on sunny days between 10:00 hrs and 16:00 hrs  
234 when mating usually occurs in the field (Khan and Herberstein, 2019). We performed each trial  
235 for 30 minutes with two new males and a female; no damselflies were reused. Paint was washed  
236 off the damselflies after every trial, and the damselflies were released at the end of the day. The  
237 aim of the experiment was to determine female mate choice between the red and yellow males,  
238 so in the analysis we included trials where a female choose to form a tandem or wheel with one  
239 of the males.

240

#### 241 Male-male interactions experiment

242 We conducted three sets of experiments to determine the effect of male colour on male-male  
243 interactions by tethering the experimental males. In the first experiment, we tethered a naturally  
244 occurring red male and a naturally occurring yellow male and determined the male-male  
245 interactions received by the red and yellow males. To determine whether the incurred  
246 interactions are the effect of colour or other developmental changes, we painted a red male  
247 yellow and tethered it with a red male and determined any male-male interactions. In the third  
248 experiment, we altered the colour of yellow males by painting them red and presented the  
249 naturally occurring yellow males with the red-painted yellow males and determined any male-  
250 male interactions. If body colour determines the interactions at the pond, we expect the yellow  
251 painted red males will receive less aggression than the red males. Similarly, the red-painted  
252 yellow males will receive less aggression than yellow males.

253 We applied a modified damsel-on-a-dowel technique (Fincke, Fargevieille, & Schultz, 2007) to  
254 determine the male-male interaction of the red and yellow males in their natural habitat. We  
255 glued a live yellow male and a red male 20 cm apart from each other on a dowel using UHU™  
256 glue. The damselflies were glued in perching positions, with their legs attached to the dowel. The  
257 dowel was then placed at the edge of the pond. In this pond, *X. erythoneurum* coexists with two  
258 heterospecific damselfly species of the Coenagrionidae family: *Ishnura heterosticta* and  
259 *Austroagrion watsoni*, with whom they share mating and oviposition sites. We measured the  
260 aggressive and non-aggressive responses received by the red and yellow *X. erythoneurum*  
261 males from conspecific males and heterospecific (*Ishnura heterosticta*) males. We observed the  
262 responses by sitting approximately one meter away from the dowel, which allowed us to observe  
263 the focal damselflies clearly without disturbing regular movements of the approaching  
264 damselflies. An approaching damselfly can detect the focal damselfly when it passes within 10  
265 cm of the focal damselfly (Fincke, 2015) and can either show aggression or non-aggression when  
266 it passes. When an intruder male passed within 10 cm left or right of the focal male without any  
267 physical contact, we counted it as a non-aggressive interaction. On the other hand, when the  
268 intruder male bit the experimental male, we counted it as an aggressive interaction (Fincke et al.,  
269 2007). Finally, if the intruder male tried to form a clasp (grab the focal male and tried to move its  
270 cerci to the prothorax of the focal male) or formed a tandem (intruder male physically connected  
271 with the focal male), we counted it as a mating attempt.

272 We conducted each trial for 10 minutes by placing the tethered damselflies in different locations  
273 around the lake. We used the same pair for three consecutive trials unless the focal damselflies  
274 were predated by sympatric odonates after one or two trials. We conducted all our experiments

275 on sunny days between 10:00 hrs and 1600 hrs when damselfly density and interactions are high  
276 (Khan and Herberstein, 2019). We counted aggressive and non-aggressive responses received by  
277 the focal males from approaching conspecific and heterospecific males. We manipulated  
278 damselfly colour following the same procedure as described in the female mate choice  
279 experiment. After finishing the experiment, we unglued the damselflies by hand, washed off the  
280 paint, and released them at the end of the day.

281

## 282 Statistical analyses

283 We applied Shapiro-Wilk tests to determine normality and F-tests to compare the variance of the  
284 data. Two-sample t-tests were applied to compare the chromatic and achromatic contrast of the  
285 males against their background. We applied Two-sample t-tests to analyse the total length, and  
286 Welch Two Sample t-test to analyse body mass, protein content and lipid content of red males  
287 and yellow males – Bonferroni corrections were applied to adjust the p-values.

288 We applied Generalized linear models (GLMs) to determine whether females are more likely to  
289 form tandems and wheels with red males than yellow painted red males. We fitted GLMs with  
290 the numbers of tandems and wheels as a response variable and male colour (red or painted  
291 yellow) as covariates. We applied Cox regression models to analyse tandem duration and wheel  
292 duration of the red and yellow painted red males. Tandems that transitioned to wheels were  
293 analysed separately from tandems that dissociated before forming wheels.

294 To analyse the aggression received by red and yellow males in male-male interaction  
295 experiments, we applied generalized linear mixed models (GLMMs) with aggression or non-

296 aggression as a response variable, focal male (red male and yellow) and intruder male  
297 (conspecific male and heterospecific male) as fixed effects and the pair identity as a random  
298 effect. For the experiments involving natural red and yellow males and natural red males with a  
299 red male painted yellow we applied binomial distribution. On the other hand, we applied a quasi-  
300 binomial distribution (to account for the over-dispersion) for the experiment in which a natural  
301 yellow male with a yellow male painted red were used as focal male. For each analysis, we used  
302 the full model (`glmer (attack, passby) ~ focal male*intruder male + (1|id)`) by including  
303 interactions between fixed effects and pair identity as random effect. All the analyses were  
304 conducted in R v 3.5.2 (R core team, 2018) using the ‘survival’ (Therneau and Lumley, 2019),  
305 ‘lme4’ (Bates et al., 2019), and ‘MuMIn’ (Bartoń, 2019) packages.

306

## 307 Results

### 308 Damsely spectra

309 The reflectance spectra of the yellow males showed peaks between 588 nm and 700 nm whereas  
310 the red males showed peaks between 657 nm and 700 nm (Figure 1a). The reflectance spectra of  
311 the background showed a Gaussian peak between 551-554 nm (Figure 1a).

312

### 313 Visual modelling

314 The chromatic and achromatic contrast between the red and yellow males and the background  
315 was more than one JND, suggesting that the males are discriminable against their background by  
316 both trichromatic (Figure 1b-1c) and tetrachromatic (Figure 1d-1e) visual systems (Figure 1b-  
317 1e). The red males showed both higher chromatic contrast (Mann-Whitney U test:  $W = 0$ ,  $p$

318 <0.0001) and achromatic contrast (Welch two sample t-test:  $t = -2.07$ ,  $df = 27.32$ ,  $p < 0.05$ ) than  
319 the yellow males in trichromatic damselfly vision (Figure 1b-1c). Similarly, in tetrachromatic  
320 damselfly vision, the red males showed higher chromatic contrast (Two sample t-test:  $t = -11.81$ ,  
321  $df = 31$ ,  $p < 0.0001$ ) and achromatic contrast (Two sample t-test:  $t = -2.49$ ,  $df = 30$ ,  $p < 0.05$ ) than  
322 the yellow males (Figure 1d-1e).

323

#### 324 Male condition

325 The red males were longer in total length (Two sample t-test:  $t = -5.13$ ,  $df = 75$ ,  $p < 0.0001$ ) and  
326 their body mass was heavier (Welch two sample t-test:  $t = -16.65$ ,  $df = 70.39$ ,  $p < 0.0001$ ) than the  
327 yellow males (Figure 2a-2b). Furthermore, lipid content of the red males was significantly higher  
328 (Mann-Whitney U test:  $W = 21$ ,  $p < 0.0001$ ) than in yellow males (Figure 2c). Similarly, protein  
329 content of the red males was significantly higher (Welch two sample t-test:  $t = -8.69$ ,  $df = 28.25$ ,  
330  $p < 0.0001$ ) than in yellow males (Figure 2d).

331

#### 332 Female mate choice

333 In total, 60 tandems were formed during the female mate choice experiment. The number of  
334 tandem formations did not differ significantly (GLM:  $\chi^2 = 0.46$ ,  $df = 1$ ,  $p = 0.49$ ) between the red  
335 males ( $n = 32$ ) and the yellow painted red males ( $n = 28$ ) (Figure 3a). Over half (51.7%) of the  
336 males failed to form a wheel after forming a tandem. The number of males proceeding from  
337 tandem to wheel did not differ significantly (GLM:  $\chi^2 = 1.63$ ,  $df = 1$ ,  $p = 0.20$ ) between the red  
338 males ( $n = 13$ ) and the yellow painted red males ( $n = 16$ ) (Figure 3b). When the tandems



339 dissociated before forming wheels, the tandem duration was not affected by male colour (Cox  
340 regression:  $\chi^2 = 1$ ,  $df = 1$ ,  $p = 1$ ) (Figure 3c). Similarly, the time to wheel formation did not differ  
341 significantly (Cox regression:  $\chi^2 = 0.62$ ,  $df = 1$ ,  $p = 0.6$ ) between the red or yellow painted red  
342 males (Figure 3d). Finally, the duration of the wheel before disassociation did not differ  
343 significantly (Cox regression:  $\chi^2 = 0.06$ ,  $df = 1$ ,  $p = 0.06$ ) between the red males ( $n = 13$ ) and the  
344 yellow painted red males ( $n = 16$ ) (Figure 3e).

345

#### 346 Male-male interactions

347 The yellow males received significantly higher aggressive responses than red males from  
348 conspecific males (estimate:  $4.48 \pm 0.38$ ,  $z = 11.74$ ,  $p < 0.001$ ) in the male-male competition  
349 experiment when natural red and yellow males were presented to intruder males (Figure 4a).  
350 Also, there was a significant interaction between focal males and intruder males (estimate:  $-1.59$   
351  $\pm 0.67$ ,  $z = -2.37$ ,  $p < 0.05$ ) showing that the probability of receiving aggression from  
352 heterospecific males was higher in yellow males than red males (Figure 4b; supplementary table  
353 2). Similarly, when yellow painted red males were presented with natural red males, yellow  
354 painted red males received significantly higher aggression than natural red males from  
355 conspecific and heterospecific males (Figure 4c- d; supplementary Table 3-4). Furthermore,  
356 when yellow males were painted red, and presented with the natural yellow males, the natural  
357 yellow males received higher aggression from conspecific and heterospecific males than the red  
358 painted yellow males (Figure 4e-f; supplementary table 5-6).

359 Discussion

360 Conspicuous male colouration can evolve through female mate choice, male-male competition  
361 for mating, to reduce male-male mating attempts or through a combination of all three (Clutton-  
362 Brock, 2007; Sherratt & Forbes, 2001). We investigated the drivers of conspicuous male  
363 colouration in *Xanthagrion erythroneurum* damselflies. We found that red males were  
364 chromatically and achromatically more conspicuous than yellow males. We further showed that  
365 red males were in better nutritional and physiological condition than yellow males. Next, we  
366 experimentally tested female preferences for male colouration and found that the females did not  
367 prefer red males over yellow males when given a choice. Finally, we tested male-male  
368 interactions in the breeding arena and found that yellow males received more aggression than red  
369 males from conspecific and heterospecific males.

370 The female mate choice experiments showed that the number of tandems did not differ between  
371 red and yellow males. In the cage experiment, females cannot avoid tandem as they cannot fly  
372 away from the approaching males. A female, however, can reject a mate by dissociating from  
373 the tandem (Khan and Herberstein, 2019). In support of that, we found that the females rejected  
374 51.7% of mating attempts in our trials. The rejection rate, however, was not different between  
375 the red and the yellow males. A female can further express refusal by delaying the wheel  
376 formation, or by dissociating from the wheel quickly before sperm transfer (Khan and  
377 Herberstein, 2019). If females preferred red males, we would have expected 1) tandem durations  
378 before dissociation are longer for red males, 2) red males attain wheel more quickly, and 3) the  
379 wheel durations are longer for red males. We, however, did not find significant differences  
380 between the red and the yellow males in any of these choice indicators. Females are unlikely to

381 detect the coloration of the males as they approach from behind to form a tandem. The females  
382 probably use tactile cues and clasping strength rather than colour to estimate male quality  
383 (Barnard and Masly, 2018; Barnard et al., 2017). Taken together, our results strongly suggest  
384 that female preferences are not selective agents of male colouration. Cryptic female choice,  
385 however, could select for male conspicuous colouration, and further studies are required for test  
386 this possibly.

387 Conspicuous male colouration can evolve by intrasexual selection if conspicuousness increases  
388 male mating success by reducing conspecific aggression in the breeding arena. Thus, we  
389 predicted that red males would receive less aggression than yellow males. Our results confirmed  
390 this prediction: yellow males (whether natural or painted) received more overall aggression than  
391 painted or natural red males. The red males received less aggression probably because the red  
392 colour signals male quality and competitive ability, thereby, serving as a status badge to resolve  
393 costly disputes without direct physical contact. Our findings are consistent with previous  
394 findings suggesting that red colouration is a signal of male condition and dominance, and  
395 functions to intimidate rivals in lizards (Healey et al., 2007; Whiting et al., 2006), fishes  
396 (Dijkstra et al., 2005), birds (Pryke and Griffith, 2006) and primates (Setchell and Wickings,  
397 2005). Furthermore, we showed that red painted yellow males received more aggression than  
398 control yellow males supporting the hypothesis that red is inherently intimidating to rivals (Baird  
399 et al., 2013; Barlow, 1983; Pryke, 2009; Rowland et al., 1995) even when additional phenotypic  
400 information (e.g. size) was available.

401 Interspecific interactions can be a significant evolutionary force to shape traits in sympatric  
402 species (Tynkkynen et al., 2004; Tynkkynen et al., 2005). Here, we showed that the natural and

403 painted red males received less heterospecific aggression than the natural and painted yellow  
404 males. The heterospecific aggression can occur due to an interspecific recognition error where  
405 males are phenotypically similar or because of male competition for common resources. Our  
406 study species, *Xanthagrion erythroneurum* with a red thorax and *Ischnura heterosticta* with a  
407 blue thorax are phenotypically dissimilar, therefore recognition error is probably an unlikely  
408 mechanism for the observed interspecific aggression. On the other hand, both species assemble  
409 at the pond for breeding, share the same perching sites for mating, foraging, and resting in  
410 between mate searching, and also share the same oviposition sites suggesting interspecific  
411 competition for breeding resources are a possible mechanism. Our findings support the idea that  
412 conspicuous colouration can reduce interspecific aggression (Drury and Grether, 2014) to  
413 acquire shared breeding resources (Lipshutz, 2018; Peiman and Robinson, 2010). In breeding  
414 ponds where damselflies mate, a large number of conspecific and heterospecific males aggregate  
415 and compete for limited mating and oviposition sites (Corbet, 1999). This suggests that, in *X.*  
416 *erythroneurum*, and probably also in other damselflies, the conspicuous colouration has evolved  
417 to reduce intra- and interspecific male-male interactions.

418 Conspicuous male colouration can also evolve through intrasexual selection to avoid costly  
419 male-male tandem attempts (Sherratt, 2001). This anti-harassment aposematic hypothesis has  
420 been supported in moor frogs showing that the males attain conspicuous colouration upon  
421 reproductive maturity to avoid male-male amplexus formation (Sztatecsny et al., 2012).  
422 Similarly, sexually dimorphic abdominal blue bands in non-territorial damselflies reduce  
423 intraspecific male-male tandem formation (Beatty et al., 2015; Khan and Herberstein, 2019). In  
424 the male-male competition experiment of this study, while presenting the males, we found that

425 conspecific males formed tandems with 11 out of 20 experimental yellow males, but never with  
426 the red males (data not shown). This preliminary result suggests that the conspicuous red  
427 colouration might also function to avoid male-male tandem formation in this species. Further  
428 behavioural choice experiments to test conspecific male mate choice between the red and yellow  
429 morphs are needed to better understand the anti-harassment signal of the red colour.

430

431 Our study combined colour vision modelling with laboratory and behavioural experiments to  
432 explain the function of the conspicuous colouration in damselflies with a scramble mating  
433 system. We showed that the conspicuous red colour in *X. erythroneurum* damselflies signal male  
434 condition. We further demonstrated that the conspicuous colouration is not a target of female  
435 mate choice but reduces inter- and intraspecific male aggression in the breeding arena. Our  
436 findings suggest that conspicuous male colouration can evolve to reduce costly male-male  
437 interactions. Because our study presents clear intra-sexual advantage of red males, the question  
438 of why yellow males persist in the population remains elusive. Further studies are needed to  
439 explain if being yellow is a resource limited constrain or it is an adaptation to reduce the foraging  
440 and predation risks associated with a red colour.

441

442

443 Figure legends:

444 Figure 1: a) Reflectance spectra (mean  $\pm$  standard deviation) of the red males ( $n = 17$ ), yellow  
445 males ( $n = 17$ ) and background leaves ( $n = 30$ ); b) chromatic and c) achromatic contrast of the  
446 red and yellow males against their background in trichromatic damselfly vision; d) chromatic  
447 and e) achromatic contrast of the red and yellow males in tetrachromatic damselfly vision.  
448 Boxplots depict the median, the 25th and 75th percentile with the whiskers extended to the  
449 minimum and maximum data points. Outliers that were  $> 1.5$  times the interquartile range. (\*  
450 indicates  $p < 0.05$ ).

451 Figure 2: a) Total length of the yellow males ( $n = 31$ ); b) and red males ( $n = 46$ ); b) body mass of  
452 the yellow males ( $n = 27$ ) and red males ( $n = 46$ ); c) lipid content of the yellow males ( $n = 19$ ),  
453 and red males ( $n = 19$ ), and d) protein content of the red males ( $n = 19$ ) and yellow males ( $n =$   
454  $19$ ). Boxplots depict the median, the 25th and 75th percentile with the whiskers extended to the  
455 minimum and maximum data points. Outliers that were  $> 1.5$  times the interquartile range were  
456 excluded. (\* indicates  $p < 0.0001$ ).

457 Figure 3: a) Number of tandems formed by red males ( $n = 32$ ), and yellow males ( $n = 28$ ); b)  
458 percentage of the tandems involving red males ( $n = 13$ ) and yellow males ( $n = 16$ ) that ended in  
459 wheel formation; c) duration of red and yellow male tandems that ended in dissociation rather  
460 than wheel formation; d) duration of red and yellow male tandems that ended in wheel  
461 formation, and e) wheel duration of red and yellow males Boxplots depict the median, the 25th  
462 and 75th percentile with the whiskers extended to the minimum and maximum data points.  
463 Outliers that were  $> 1.5$  times the interquartile range were excluded.

464 Figure 4: Aggressions (number of attacks/number of approaches) received by natural red and  
465 natural yellow males ( $n = 20$ ) from a) conspecific males and b) heterospecific males; c)  
466 aggressions received by natural red males, and yellow painted red males ( $n = 20$ ) from  
467 conspecific males and d) heterospecific males; e) aggressions received by natural yellow males  
468 and red painted yellow males ( $n = 18$ ) from conspecific males, and f) heterospecific males.  
469 Boxplots depict the median, the 25th and 75th percentile with the whiskers extended to the  
470 minimum and maximum data points. Dots are data points; outliers that were  $> 1.5$  times the  
471 interquartile range were excluded.

472

473 Acknowledgements: We thank Jim McLean for his comments on the initial version of the  
474 manuscripts. MKK thanks Payal Barua for all her support. MKK designed the study, collected  
475 and analysed the data, and wrote the manuscript. MEH contributed to the design of the study,  
476 and critical revision of the manuscript.

477

478 Data accessibility: All data will be uploaded in Figshare upon acceptance for publication

479

480 References

- 481 **Ahnesjö, I., Kvarnemo, C. and Merilaita, S.** (2001). Using potential reproductive rates to  
482 predict mating competition among individuals qualified to mate. *Behav. Ecol.* **12**, 397–  
483 401.
- 484 **Albo, M. J. and Peretti, A. V.** (2015). Worthless and Nutritive Nuptial Gifts: Mating Duration,  
485 Sperm Stored and Potential Female Decisions in Spiders. *PLOS ONE* **10**, e0129453.
- 486 **Baird, T. A., Baird, T. D. and Shine, R.** (2013). Showing Red: Male Coloration Signals Same-  
487 Sex Rivals in an Australian Water Dragon. *Herpetologica* **69**, 436–444.
- 488 **Bajer, K., Molnár, O., Török, J. and Herczeg, G.** (2011). Ultraviolet nuptial colour determines  
489 fight success in male European green lizards (*Lacerta viridis*). *Biol. Lett.* **7**, 866–868.
- 490 **Balmford, A., Albon, S. and Blakeman, S.** (1992a). Correlates of male mating success and  
491 female choice in a lek-breeding antelope. *Behav. Ecol.* **3**, 112–123.
- 492 **Balmford, A., Rosser, A. M. and Albon, S. D.** (1992b). Correlates of female choice in  
493 resource-defending antelope. *Behav. Ecol. Sociobiol.* **31**, 107–114.
- 494 **Barlow, G. W.** (1983). Do Gold Midas Cichlid Fish Win Fights because of Their Color, or  
495 Because They Lack Normal Coloration? A Logistic Solution. *Behav. Ecol. Sociobiol.* **13**,  
496 197–204.
- 497 **Barnard, A. A. and Masly, J. P.** (2018). Divergence in female damselfly sensory structures is  
498 consistent with a species recognition function but shows no evidence of reproductive  
499 character displacement. *Ecol. Evol.* **8**, 12101–12114.
- 500 **Barnard, A. A., Fincke, O. M., McPeck, M. A. and Masly, J. P.** (2017). Mechanical and  
501 tactile incompatibilities cause reproductive isolation between two young damselfly  
502 species. *Evolution* **71**, 2410–2427.
- 503 **Barry, K. L. and Wilder, S. M.** (2013). Macronutrient intake affects reproduction of a  
504 predatory insect. *Oikos* **122**, 1058–1064.
- 505 **Barry, K. L., White, T. E., Rathnayake, D. N., Fabricant, S. A. and Herberstein, M. E.**  
506 (2015). Sexual signals for the colour-blind: cryptic female mantids signal quality through  
507 brightness. *Funct. Ecol.* **29**, 531–539.
- 508 **Bartoń, K.** (2019). *MuMIn: Multi-Model Inference*.
- 509 **Bates, D., Maechler, M., Bolker, B., Walker, S., Christensen, R. H. B., Singmann, H., Dai,**  
510 **B., Scheipl, F., Grothendieck, G., Green, P., et al.** (2019). *lme4: Linear Mixed-Effects*  
511 *Models using “Eigen” and S4*.



- 512 **Beatty, C. D., Andrés, J. A. and Sherratt, T. N.** (2015). Conspicuous Coloration in Males of  
513 the Damselfly *Nehalennia irene* (Zygoptera: Coenagrionidae): Do Males Signal Their  
514 Unprofitability to Other Males? *PLOS ONE* **10**, e0142684.
- 515 **Bybee, S., Córdoba-Aguilar, A., Duryea, M. C., Futahashi, R., Hansson, B., Lorenzo-**  
516 **Carballa, M. O., Schilder, R., Stoks, R., Suvorov, A., Svensson, E. I., et al.** (2016).  
517 Odonata (dragonflies and damselflies) as a bridge between ecology and evolutionary  
518 genomics. *Front. Zool.* **13**, 46.
- 519 **Castaños, C. E., Córdoba-Aguilar, A. and Munguía-Steyer, R.** (2017). Physiological  
520 condition and wing pigmentation expression in a damselfly with seasonal polyphenism:  
521 Polyphenism and condition in a damselfly. *Physiol. Entomol.* **42**, 346–354.
- 522 **Clutton-Brock, T.** (2007). Sexual Selection in Males and Females. *Science* **318**, 1882–1885.
- 523 **Corbet, P. S.** (1999). *Dragonflies: Behaviour and ecology of odonata*. USA: Cornell University  
524 Press.
- 525 **Debuse, V. J., Addison, J. T. and Reynolds, J. D.** (2003). Effects of breeding site density on  
526 competition and sexual selection in the European lobster. *Behav. Ecol.* **14**, 396–402.
- 527 **Dijkstra, P. D., Seehausen, O. and Groothuis, T. G. G.** (2005). Direct male-male competition  
528 can facilitate invasion of new colour types in Lake Victoria cichlids. *Behav. Ecol.*  
529 *Sociobiol.* **58**, 136–143.
- 530 **Drury, J. P. and Grether, G. F.** (2014). Interspecific aggression, not interspecific mating,  
531 drives character displacement in the wing coloration of male rubyspot damselflies  
532 (*Hetaerina*). *Proc. R. Soc. B Biol. Sci.* **281**,.
- 533 **Emlen, D. J.** (2008). The Evolution of Animal Weapons. *Annu. Rev. Ecol. Evol. Syst.* **39**, 387–  
534 413.
- 535 **Fincke, O. M.** (1997). Conflict resolution in the Odonata: implications for understanding female  
536 mating patterns and female choice. *Biol. J. Linn. Soc.* **60**, 201–220.
- 537 **Fincke, O. M.** (2015). Trade-offs in female signal apparency to males offer alternative anti-  
538 harassment strategies for colour polymorphic females. *J. Evol. Biol.* **28**, 931–943.
- 539 **Fincke, O. M., Fargevielle, A. and Schultz, T. D.** (2007). Lack of innate preference for morph  
540 and species identity in mate-searching *Enallagma* damselflies. *Behav. Ecol. Sociobiol.* **61**,  
541 1121–1131.
- 542 **Forslund, P.** (2000). Male–male competition and large size mating advantage in European  
543 earwigs, *Forficula auricularia*. *Anim. Behav.* **59**, 753–762.

- 544 **Georgiev, A. V., Muehlenbein, M. P., Prall, S. P., Emery Thompson, M. and Maestripieri,**  
545 **D.** (2015). Male quality, dominance rank, and mating success in free-ranging rhesus  
546 macaques. *Behav. Ecol.* **26**, 763–772.
- 547 **Gering, E. J.** (2017). Male-mimicking females increase male-male interactions, and decrease  
548 male survival and condition in a female-polymorphic damselfly. *Evolution* **71**, 1390–  
549 1396.
- 550 **Gomez, D., Richardson, C., Lengagne, T., Plenet, S., Joly, P., Léna, J.-P. and Théry, M.**  
551 (2009). The role of nocturnal vision in mate choice: females prefer conspicuous males in  
552 the European tree frog (*Hyla arborea*). *Proc. R. Soc. B Biol. Sci.* **276**, 2351–2358.
- 553 **Healey, M., Uller, T. and Olsson, M.** (2007). Seeing red: morph-specific contest success and  
554 survival rates in a colour-polymorphic agamid lizard. *Anim. Behav.* **74**, 337–341.
- 555 **Henze, M. J., Lind, O., Kohler, M. and Kelber, A.** (2013). Frontiers | Seeing and (not) being  
556 seen: Sensory ecology of the blue-tailed damselfly *Ischnura elegans*.p. Fjälkinge,  
557 Sweden: Frontiers in Physiology.
- 558 **Hill, G. E.** (1991). Plumage coloration is a sexually selected indicator of male quality. *Nature*  
559 **350**, 337.
- 560 **Huang, S., Chiou, T., Marshall, J. and Reinhard, J.** (2014). Spectral sensitivities and color  
561 signals in a polymorphic damselfly. *PloS One* **9**, e87972.
- 562 **Jones, A. G. and Ratterman, N. L.** (2009). Mate choice and sexual selection: What have we  
563 learned since Darwin? *Proc. Natl. Acad. Sci.* **106**, 10001–10008.
- 564 **Kemp, D. J.** (2007). Female butterflies prefer males bearing bright iridescent ornamentation.  
565 *Proc. R. Soc. B Biol. Sci.* **274**, 1043–1047.
- 566 **Keyser, A. J. and Hill, G. E.** (2000). Structurally based plumage coloration is an honest signal  
567 of quality in male blue grosbeaks. *Behav. Ecol.* **11**, 202–209.
- 568 **Khan, M. K.** (2015). Dragonflies and damselflies (Insecta: Odonata) of the northeastern region  
569 of Bangladesh with five new additions to the Odonata fauna of Bangladesh. *J. Threat.*  
570 *Taxa* **7**, 7795–7804.
- 571 **Khan, M. K.** (2018). Odonata of eastern Bangladesh with three new records for the country. *J.*  
572 *Threat. Taxa* **10**, 12821–12827.
- 573 **Khan, M. K. and Herberstein, M. E.** (2019). Sexually dimorphic blue bands are intra-sexual  
574 aposematic signals in non-territorial damselflies. *Anim. Behav.* **156**, 21–29.
- 575 **Khan, M. K. and Herberstein, M. E.** (2020). Ontogenetic colour change signals sexual  
576 maturity in a non-territorial damselfly. *Ethology* **126**, 51–58.

- 577 **Kirkpatrick, M. and Barton, N. H.** (1997). The strength of indirect selection on female mating  
578 preferences. *Proc. Natl. Acad. Sci.* **94**, 1282–1286.
- 579 **Klug, H., Lindström, K. and Kokko, H.** (2010). Who to include in measures of sexual  
580 selection is no trivial matter. *Ecol. Lett.* **13**, 1094–1102.
- 581 **Korzan, W. J. and Fernald, R. D.** (2007). Territorial male color predicts agonistic behavior of  
582 conspecifics in a color polymorphic species. *Behav. Ecol.* **18**, 318–323.
- 583 **Ligon, R. A. and McGraw, K. J.** (2013). Chameleons communicate with complex colour  
584 changes during contests: different body regions convey different information. *Biol. Lett.*  
585 **9**, 20130892.
- 586 **Lim, M. L. M. and Li, D.** (2013). UV-Green Iridescence Predicts Male Quality during Jumping  
587 Spider Contests. *PLOS ONE* **8**, e59774.
- 588 **Lipshutz, S. E.** (2018). Interspecific competition, hybridization, and reproductive isolation in  
589 secondary contact: missing perspectives on males and females. *Curr. Zool.* **64**, 75–88.
- 590 **López Pilar and Martín José** (2005). Female Iberian wall lizards prefer male scents that signal  
591 a better cell-mediated immune response. *Biol. Lett.* **1**, 404–406.
- 592 **Maia, R., Gruson, H., Endler, J. A. and White, T. E.** (2019). pavo 2: new tools for the spectral  
593 and spatial analysis of colour in R. *Methods Ecol. Evol.* **0**,
- 594 **Montoya, B. and Torres, R.** (2015). Male skin color signals direct and indirect benefits in a  
595 species with biparental care. *Behav. Ecol.* **26**, 425–434.
- 596 **Morris, M. R., Batra, P. and Ryan, M. J.** (1992). Male-Male Competition and Access to  
597 Females in the Swordtail *Xiphophorus nigrensis*. *Copeia* **1992**, 980–986.
- 598 **Parker, T. H.** (2013). What do we really know about the signalling role of plumage colour in  
599 blue tits? A case study of impediments to progress in evolutionary biology. *Biol. Rev.* **88**,  
600 511–536.
- 601 **Peiman, K. S. and Robinson, B. W.** (2010). Ecology and Evolution of Resource-Related  
602 Heterospecific Aggression. *Q. Rev. Biol.* **85**, 133–158.
- 603 **Petrie, M., Tim, H. and Carolyn, S.** (1991). Peahens prefer peacocks with elaborate trains.  
604 *Anim. Behav.* **41**, 323–331.
- 605 **Pryke, S. R.** (2009). Is red an innate or learned signal of aggression and intimidation? *Anim.*  
606 *Behav.* **78**, 393–398.

- 607 **Pryke, S. R. and Griffith, S. C.** (2006). Red dominates black: agonistic signalling among head  
608 morphs in the colour polymorphic Gouldian finch. *Proc. R. Soc. B Biol. Sci.* **273**, 949–  
609 957.
- 610 **Rowland, W. J., Bolyard, K. J. and Halpern, A. D.** (1995). The dual effect of stickleback  
611 nuptial coloration on rivals: manipulation of a graded signal using video playback. *Anim.*  
612 *Behav.* **50**, 267–272.
- 613 **Schneider, C. A., Rasband, W. S. and Eliceiri, K. W.** (2012). NIH Image to ImageJ: 25 years  
614 of image analysis. *Nat. Methods* **9**, 671.
- 615 **Setchell, J. M.** (2005). Do Female Mandrills Prefer Brightly Colored Males? *Int. J. Primatol.* **26**,  
616 715–735.
- 617 **Setchell, J. M. and Wickings, E. J.** (2005). Dominance, Status Signals and Coloration in Male  
618 Mandrills (*Mandrillus sphinx*). *Ethology* **111**, 25–50.
- 619 **Sherratt, T. N.** (2001). The evolution of female-limited polymorphisms in damselflies: a signal  
620 detection model. *Ecol. Lett.* **4**, 22–29.
- 621 **Sherratt, T. N. and Forbes, M. R.** (2001). Sexual differences in coloration of Coenagrionid  
622 damselflies (Odonata): a case of intraspecific aposematism? *Anim. Behav.* **62**, 653–660.
- 623 **Shuster, S. M. and Wade, M. J.** (2003). *Mating Systems and Strategies: Monographs in*  
624 *Behavior and Ecology*. Princeton University Press.
- 625 **Siva-Jothy, M. T.** (1999). Male wing pigmentation may affect reproductive success via female  
626 choice in a Calopterygid damselfly (Zygoptera). *Behaviour* **136**, 1365–1377.
- 627 **Svensson, E. I., Kristoffersen, L., Oskarsson, K. and Bensch, S.** (2004). Molecular population  
628 divergence and sexual selection on morphology in the banded demoiselle ( *Calopteryx*  
629 *splendens* ). *Heredity* **93**, 423.
- 630 **Sztatecsny, M., Preininger, D., Freudmann, A., Loretto, M.-C., Maier, F. and Hödl, W.**  
631 (2012). Don't get the blues: conspicuous nuptial colouration of male moor frogs (*Rana*  
632 *arvalis*) supports visual mate recognition during scramble competition in large breeding  
633 aggregations. *Behav. Ecol. Sociobiol.* **66**, 1587–1593.
- 634 **Theischinger, G. and Hawking, J.** (2016). *The Complete Field Guide to Dragonflies of*  
635 *Australia*. 3rd ed. Victoria: CSIRO Publishing.
- 636 **Therneau, T. M. and Lumley, T.** (2019). *A Package for Survival Analysis*.
- 637 **Tynkkynen, K., Rantala, M. J. and Suhonen, J.** (2004). Interspecific aggression and character  
638 displacement in the damselfly *Calopteryx splendens*. *J. Evol. Biol.* **17**, 759–767.

- 639 **Tynkkynen, K., Kotiaho, J. S., Luojumäki, M. and Suhonen, J.** (2005). Interspecific  
640 Aggression Causes Negative Selection on Sexual Characters. *Evolution* **59**, 1838–1843.
- 641 **Vásquez, T. and Pfennig, K. S.** (2007). Looking on the bright side: females prefer coloration  
642 indicative of male size and condition in the sexually dichromatic spadefoot toad,  
643 *Scaphiopus couchii*. *Behav. Ecol. Sociobiol.* **62**, 127–135.
- 644 **Vorobyev, M. and Osorio, D.** (1998). Receptor noise as a determinant of colour thresholds.  
645 *Proc. R. Soc. Lond. B Biol. Sci.* **265**, 351–358.
- 646 **Vorobyev, M., Brandt, R., Peitsch, D., Laughlin, S. B. and Menzel, R.** (2001). Colour  
647 thresholds and receptor noise: behaviour and physiology compared. *Vision Res.* **41**, 639–  
648 653.
- 649 **Wacker, S. and Amundsen, T.** (2014). Mate competition and resource competition are inter-  
650 related in sexual selection. *J. Evol. Biol.* **27**, 466–477.
- 651 **Weaver, R. J., Koch, R. E. and Hill, G. E.** (2017). What maintains signal honesty in animal  
652 colour displays used in mate choice? *Philos. Trans. R. Soc. B Biol. Sci.* **372**, 20160343.
- 653 **Weir, L. K., Grant, J. W. A., Hutchings, J. A., Alonzo, A. E. S. H. and Shaw, E. R. G.**  
654 (2011). The Influence of Operational Sex Ratio on the Intensity of Competition for  
655 Mates. *Am. Nat.* **177**, 167–176.
- 656 **Whiting, M. J., Stuart-Fox, D. M., O'Connor, D., Firth, D., Bennett, N. C. and Blomberg, S.**  
657 **P.** (2006). Ultraviolet signals ultra-aggression in a lizard. *Anim. Behav.* **72**, 353–363.
- 658
- 659

660 Figure 1

661

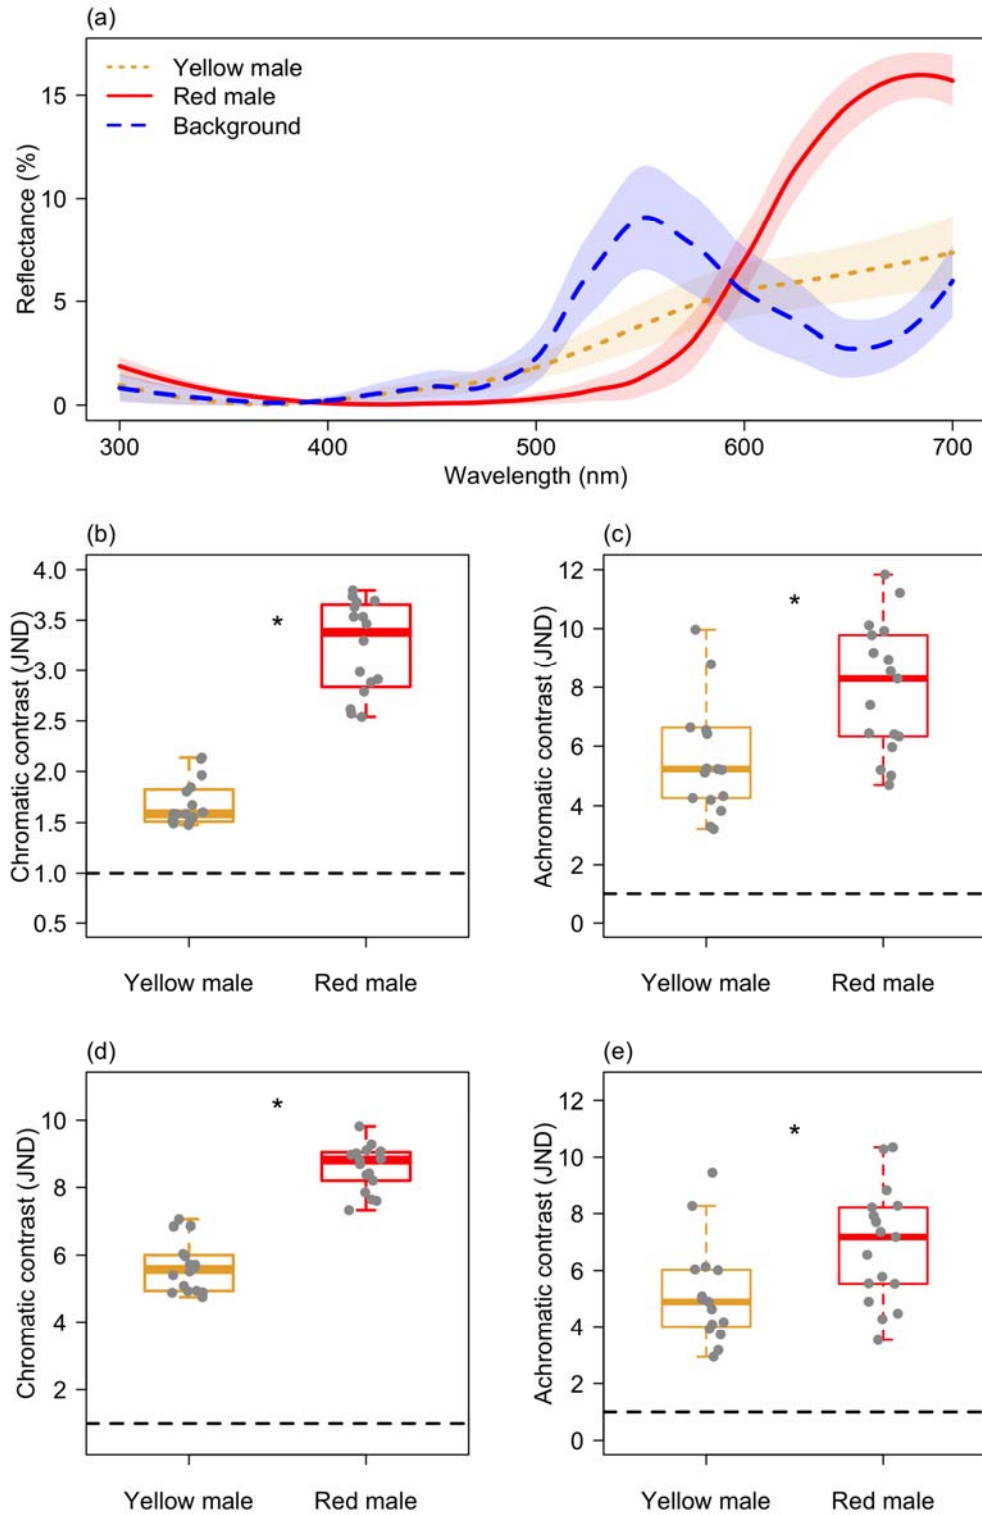

662 Figure 2:

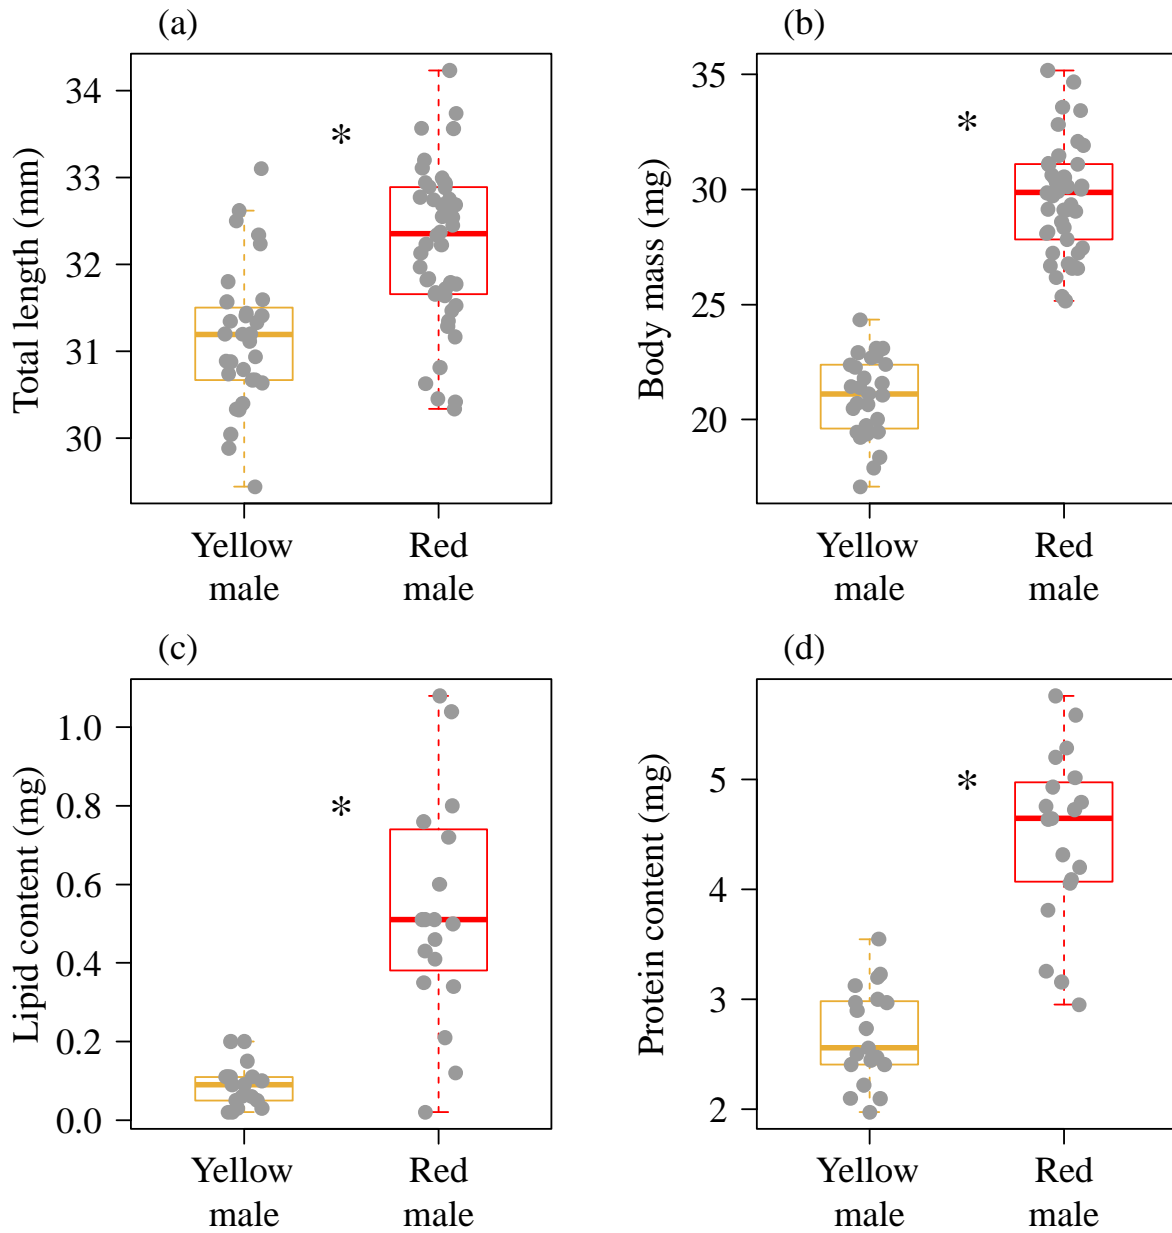

663

664

665

666



667 Figure 3:

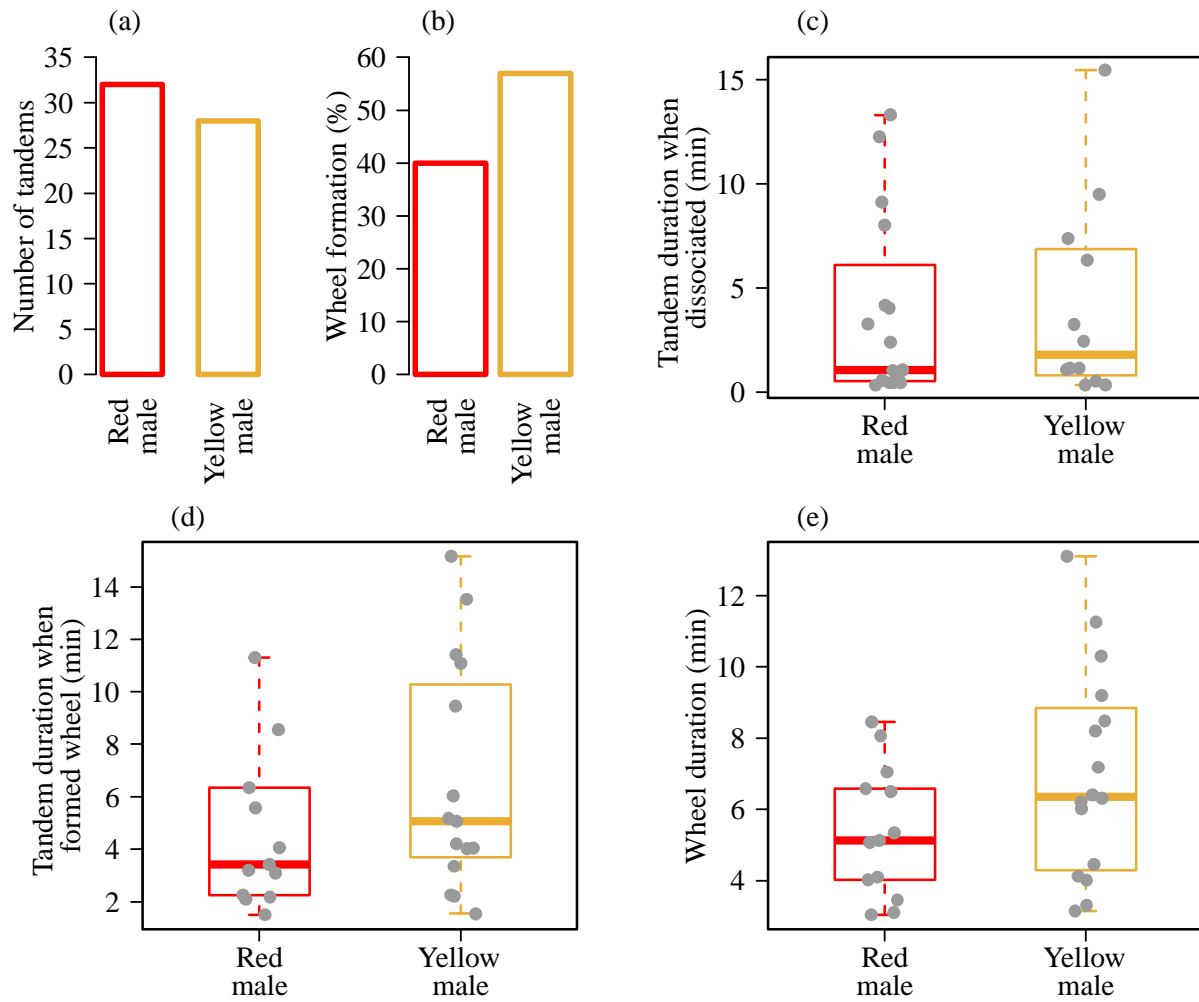

668

669

670

671

672

673



674 Figure 4:

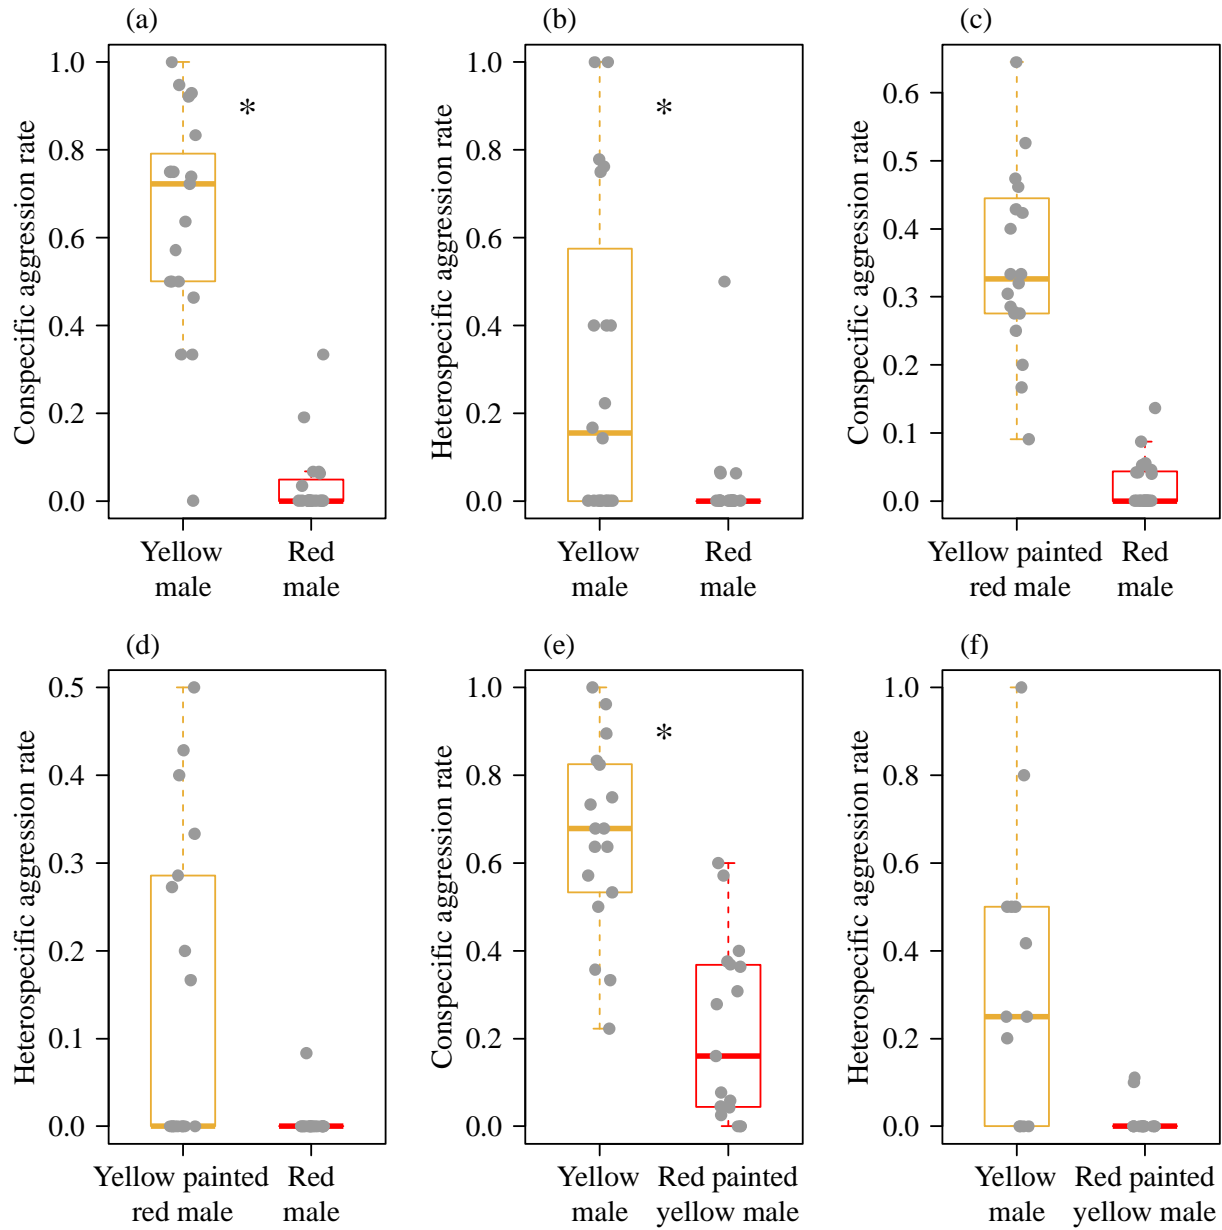

675
